# Supplementary material for: Gene Suppression of Transketolase-Like Protein 1 (TKTL1) Sensitizes Glioma Cells to Hypoxia and Ionizing Radiation
Source: MDPI journal article supplement (doi:10.3390/ijms19082168), 2018-07-25
Supplement: s1 [file s1]

# Gene Suppression of Transketolase-Like Protein 1 (TKTL1) Sensitizes Glioma Cells to Hypoxia and Ionizing Radiation

Sonja Heller, Gabriele D. Maurer, Christina Wanka, Ute Hofmann, Anna-Luisa Luger, Ines Bruns, Joachim P. Steinbach, Johannes Rieger

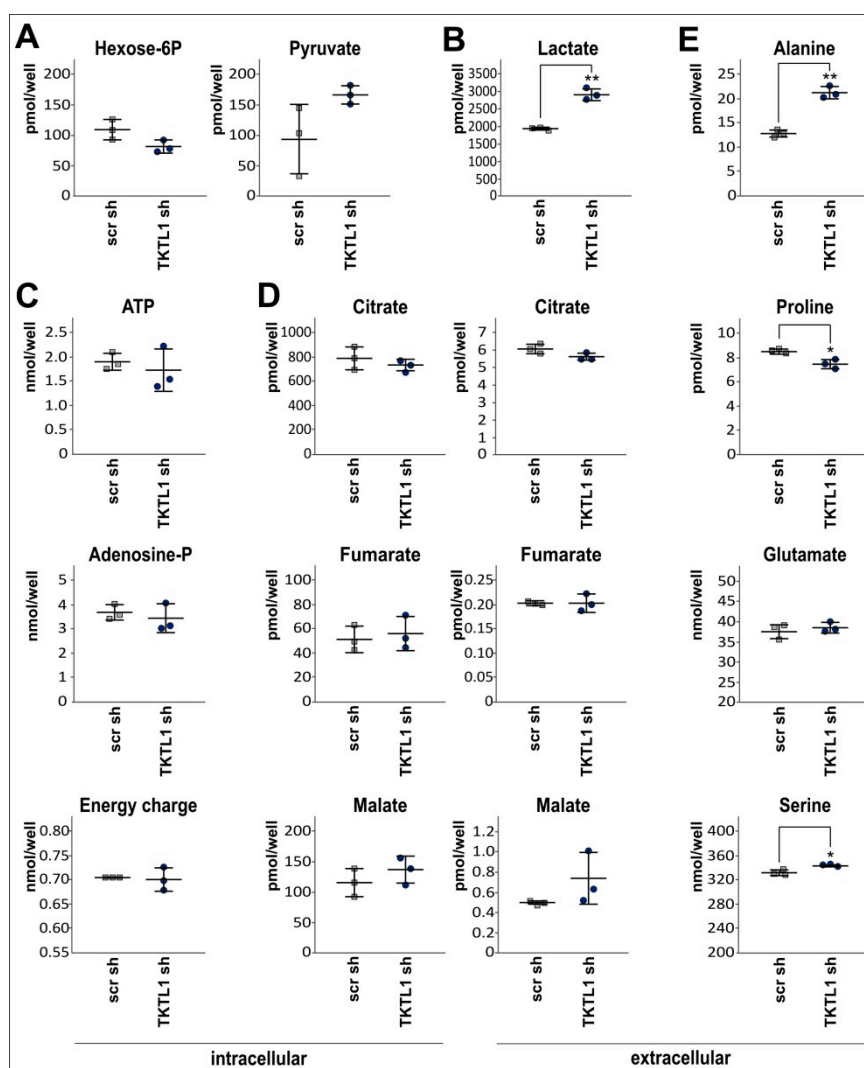

**Figure S1.** Analysis of selected metabolic parameters in LNT-229-shTKTL1 and control cells under normoxic conditions. (A) Intracellular concentrations of hexose-6-phosphate (Hexose-6P) and pyruvate did not differ significantly, whereas (B) extracellular lactate levels were found to be higher in LNT-229-shTKTL1 cells (\*\* $p < 0.01$ ). (C) Quantities of adenosine triphosphate (ATP) and adenosine phosphate (Adenosine-P), as well as the calculated energy charge  $(ATP + 0.5 \cdot ADP) / (ATP + ADP + AMP)$  [1], were not different either. (D) Concentrations of fumarate, malate and citrate, intermediates of the tricarboxylic acid cycle, were measured both intra- and extracellularly. (E) Further, the extracellular content of amino acids alanine, proline, glutamate and serine was monitored.

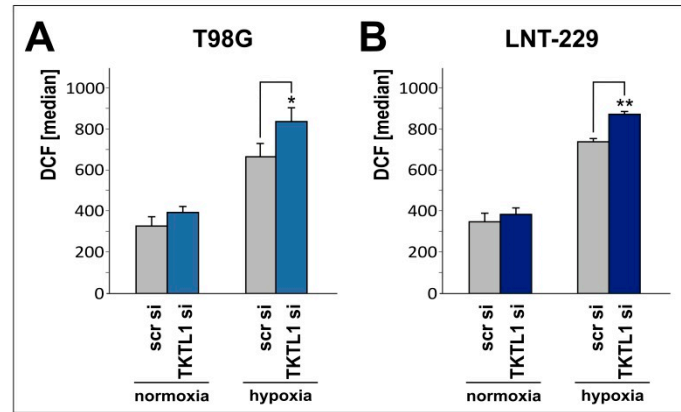

**Figure S2.** *TKTL1* gene suppression raises ROS levels under hypoxic conditions. T98G (A) and LNT-229 (B) cells were transiently transfected with 20 nM of either scrambled control siRNA or siRNA targeting *TKTL1*. 24 h later, cells were exposed to serum-free medium containing 5 mM glucose and to normoxic or hypoxic conditions. Another 20 h later, intracellular ROS generation was estimated using H<sub>2</sub>DCFDA and flow cytometry (median fluorescence intensity, mean + SD, \* $p < 0.05$ , \*\* $p < 0.01$ ).

## References

1. Atkinson, D.E.; Walton, G.M. Adenosine triphosphate conservation in metabolic regulation. Rat liver citrate cleavage enzyme. *J. Biol. Chem.* **1967**, *242*, 3239–3241.
